# Transcriptomics reveals patterns of sexually dimorphic gene expression in an avian hypothalamic–pituitary–gonadal (HPG) axis

Matthew MacManes<sup>1\*</sup>, Suzanne Austin<sup>2</sup>, Andrew Lang<sup>1</sup>, April Booth<sup>2</sup>, Victoria Farrar<sup>2</sup>, Rebecca M. Calisi<sup>2</sup>

<sup>1</sup> Department of Molecular, Cellular, and Biomedical Sciences. University of New Hampshire, Durham NH 03824

<sup>2</sup> Department of Neurobiology, Physiology, and Behavior. University of California, Davis. Davis CA. 95616

\* Corresponding author: [macmanes@gmail.com](mailto:macmanes@gmail.com) @macmanes

Keywords: reproductive axis, rock dove, pigeon, *Columba livia*, gene expression, RNAseq, reproduction, sexual behavior

# **ABSTRACT**

The hypothalamic-pituitary-gonadal (HPG) axis is a key biological system required for reproduction and associated sexual behaviors to occur. Each of these tissues, the hypothalamus in the brain, the pituitary gland, and the gonads (testes and ovaries), has specialized and sometimes sex-specific functions that promote, amongst other things, reproductive processes. To fully characterize the transcript community of each aspect of the HPG axis, as well as to uncover potentially important sex-specific differences, we characterized patterns of gene expression in sexually mature male and female rock dove (*Columba livia*) hypothalamus, pituitary, and gonads. We describe patterns of gene expression amongst tissues as well as patterns of sex-biased gene expression which may underlie some of the fundamental differences between male and female reproductive behavior. We report greater sex-biased differential expression in the pituitary (233 genes out of 15,102 genes) as compared to the hypothalamus (1 gene out of 15,102 genes), with multiple genes overexpressed in the male pituitary gland being related to locomotion, and multiple genes over-expressed in the female pituitary gland being related to reproduction, growth, and development. These genes may be associated with facilitating the different roles the HPG system plays in sex-specific reproductive behavior, including life-history strategies characterized by short-term payoffs in males (i.e. locomotion) and longer-term payoffs in females (i.e. development and reproduction). In addition, we report novel patterns of sex-biased expression in genes involved in reproduction-associated processes. Gonadotropin-releasing hormone, Progesterone, and Androgen receptor were upregulated in the female pituitary as compared to the male pituitary. We also found greater expression of Prolactin in the female pituitary as compared to the male pituitary, but it was more highly expressed in the male hypothalamus as compared to the female hypothalamus. The Prolactin receptor was also more highly expressed in the male hypothalamus and pituitary gland as compared to corresponding female tissues. Finally, we discovered greater expression of Arginine Vasopressin Receptor 1A in the male pituitary as compared to the female pituitary. Using a more global analysis, we discovered other interesting sex-biased patterns in genes not originally targeted for investigation. These genes include like Betacellulin (BTC), which was upregulated in the female pituitary and compared to males, and Ecto-NOX Disulfide-Thiol Exchanger 1 (ENOX1), which was upregulated in the male pituitary as compared to females. These genes may play important, though currently unknown, roles in reproductive physiology and behavior. In conclusion, we reveal patterns of tissue specific and sexually dimorphic gene expression in the HPG axis, highlighting the need for sex parity in transcriptomic studies and providing new lines of investigation of the mechanisms of reproductive function.

## INTRODUCTION

The hypothalamic-pituitary-gonadal (HPG) axis is a system comprised of endocrine glands whose function is vital to the regulation of reproduction and associated behaviors (Fig. 1). In all vertebrates studied, from humans to Agnatha, the jawless fishes, the HPG is present and its function is generally conserved (Sower et al., 2009). For reproduction to occur, the hypothalamus must produce and secrete gonadotropin-releasing hormone (GnRH), which causes the pituitary gland to secrete gonadotropins, luteinizing hormone (LH) and follicle stimulating hormone (FSH) (Sherwood and Sower, 1985). LH and FSH travel through the bloodstream and act upon receptors in the gonads (i.e. testes or ovaries), stimulating gametogenesis and the secretion of sex steroids, such as testosterone and estradiol. These sex steroids then bind with receptors within the HPG axis to create a feedback system that facilitates reproduction and sexual behaviors. The HPG axis has been lauded for providing a foundation to guide reproductive endocrinology investigations, but it has also been criticized as an overly simplistic depiction of the mechanisms mediating reproduction. Now, burgeoning genomic sequencing technologies afford us a deeper and more complete understanding of the mechanistic drivers of reproduction by allowing us to understand how differential gene expression between the sexes could underpin sexually dimorphic reproductive behavior, and how the full complement of genes expressed in the HPG could work in concert to define physiology and behavior (Calisi and MacManes 2015).

Previous understanding of HPG function has come about by measuring the amount of circulating hormones in blood, conducting immunochemistry to visualize protein presence or absence, conducting *in situ hybridization* to visualize a target gene, and the use of endocrine and receptor agonists and antagonists and their resulting physiological and behavioral effects. Due to recent technological advances, researchers are beginning to identify correlative and causative links between gene activity and phenotype (Saldanha et al., 2010; Dhillo et al., 2005; Lake et al., 2008; Zhang et al., 2008; Wang et al., 2011; Qin et al., 2014; Han et al., 2015). Concerning the genomics of reproduction, some studies have generated whole-organism or tissue-specific sequence data of which the HPG axis was a subset (Peterson et al., 2012; Cánovas et al., 2014). Even fewer studies have reported observing differential gene expression of the HPG axis as a global system (Xu et al., 2011). Here, we focus specifically on patterns of tissue and sexually dimorphic gene expression in the HPG axis of the rock dove (*Columba livia*) and discuss how they might relate to male and female reproductive strategies.

We characterize the first sex-specific avian HPG transcriptome using RNA extracted from whole hypothalamus, pituitary, and gonads of sexually mature male and female rock doves (*Columba livia*). We constructed an annotated *de novo* transcriptome assembly for these tissues, which then enabled us to quantify the abundance of all mRNA transcripts per tissue. By incorporating candidate gene and *ab initio* approaches across all tissue types and between sexes, we were able to both characterize general patterns of gene expression and identify specific patterns of sex-biased expression. It is our intention that these data 1) illuminate potential sex differences in gene presence and expression throughout the HPG axis, and 2) be used as a tool by the scientific community to expand the depth and scope of investigations involving the HPG axis.

Figure 1. Illustration of the hypothalamus, pituitary, and gonads of male and female rock doves.

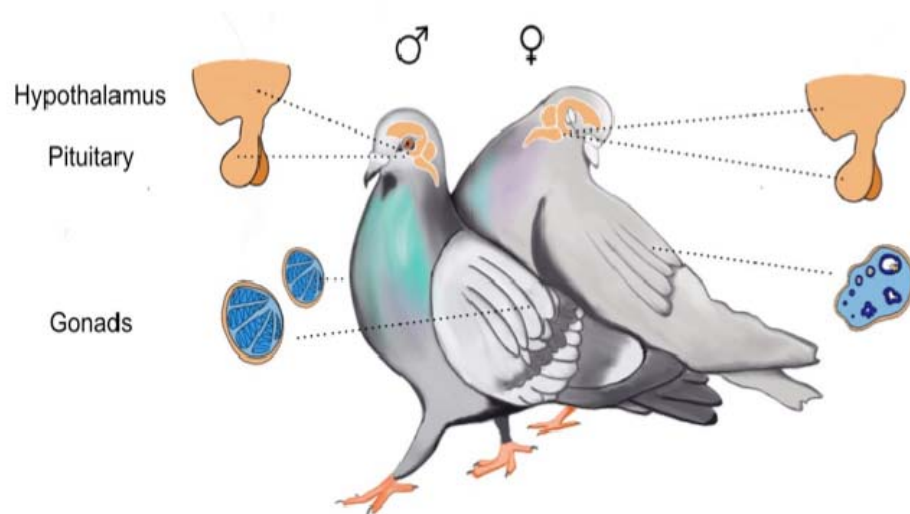

## Methods

### ***Animal Collection Methods***

Birds were housed at the University of California, Davis, in large aviaries (5'x4'x7'), with 8 sexually reproductive adult pairs per aviary. Birds were allowed to pair naturally. However, all birds used in this study were without eggs or chicks at the time they were sampled. Sampling

occurred between 0900-1200 (PST) following animal care and handling protocols (UC Davis IACUC #18895). Birds were sacrificed within 3 min of entering their cage. They were anesthetized using isoflurane prior to decapitation. Brains, pituitaries, and gonads were extracted and immediately placed on dry ice and transferred within the hour to a -80°C freezer until further processing. Frozen brains were coronally sectioned on a cryostat (Leica CM 1860) at 100µm and the hypothalamus was isolated using surgical punches. We used Karten and Hodos' stereotaxic atlas (Karten and Hodos, 1967) of the brain of the pigeon to locate the hypothalamus and collect it in its entirety. In brief, we, collected hypothalamic tissue beginning at the point of bifurcation of the tractus septomesencephalicus and ending after the cerebellum was well apparent. Hypothalamic, pituitary, and gonadal tissue were preserved at -80°C in RNALater and shipped from the University of California, Davis, to the University of New Hampshire for further processing.

### ***Library Preparation and Sequencing***

Tissues frozen in RNALater were thawed on ice in an RNase-free work environment. Total RNA was extracted using a standard Trizol extraction protocol (Thermo Fisher Scientific, Waltham, MA). The quality of the resultant extracted total RNA was characterized using the TapeStation 2200 Instrument (Agilent, Santa Clara, CA), after which Illumina sequence libraries were prepared using the TruSeq RNA Stranded LT Kit (Illumina). The TapeStation 2200 Instrument was, again, used to determine the quality and concentration of these libraries. Each library was diluted to 2nM with sterile ddH<sub>2</sub>O, and pooled in a multiplexed library sample. The multiplexed library sample was then sent to the New York Genome Center for 125 or 150 base pair paired-end sequencing on a HiSeq 2500 platform.

### ***Sequence Quality Control and Assembly***

Sequence read data were downloaded and quality checked using FastQC version 0.11.5 (Andrews, 2016). A *de novo* transcriptome for the HPG was assembled following the Oyster River Protocol for Transcriptome Assembly (MacManes, 2015). In brief, 59 million paired end reads from two individuals (1 male and 1 female) were error corrected using RCorrector version 1.0.2 (Song and Florea, 2015). Adapters, as well as bases with a Phred score <2 were trimmed using Skewer 0.2.2 (Jiang et al., 2014), and assembly was carried out using Trinity version 2.2.0 (Haas et al., 2013), Binner version 1.0 (Liu et al., 2016), and Shannon version 0.0.2 (Kannan et al., 2016), after which the resultant transcriptomes were merged using the software package transfuse version 0.5.0 (<https://github.com/cbournsnell/transfuse>). Lowly expressed transcripts,

defined as those with an abundance of less than 0.5 transcript-per-million (TPM<0.5), were filtered out of the dataset. The resultant assembly was annotated using the software package dammit (<https://github.com/camillescott/dammit>), and evaluated using BUSCO 2.0 beta 3 (Simão et al., 2015) and TransRate version 1.0.1 (Smith-Unna et al., 2015).

### **Mapping and Differential Gene Expression**

Raw reads were mapped to the annotated transcriptome after a quasi-mapping index was prepared using Salmon 0.7.0 (Patro et al., 2015). Rock dove transcript IDs were mapped to genes from *Gallus gallus* genome version 5, using BLAST (Camacho et al., 2009). All data were then imported into the R statistical package (version 3.3.0) (RStudio Team, 2015) using tximport (Soneson et al., 2015) for gene level evaluation of gene expression, which was calculated using edgeR (version 3.1.4) (Robinson et al., 2010) following TMM normalization and correction for multiple hypothesis tests by setting the false discovery rate (FDR) to 1%.

### **Gene Expression Evaluation**

Patterns of gene expression were evaluated using two distinct methods. First, we selected *a priori* genes of interest based on their known involvement in reproduction and associated behaviors (Table 3). Differences in gene expression were evaluated between these genes in the hypothalamic, pituitary, and gonadal tissues and between both sexes using a generalized linear model framework (expression ~ sex \* tissue) with post-hoc significance for all pairwise combinations of factors tested using the Bioconductor package lsmeans (<https://cran.r-project.org/package=lsmeans>). Second, a more global investigation of differential expression was conducted to characterize the general presence and expression of all genes per tissue and how they might differ between the sexes. A comparison of differential expression between tissues was not carried out secondary to results from preliminary analysis suggesting that most genes are expressed differently, thus, making meaningful comparisons uninformative. Instead, to characterize patterns of expression in each tissue, we generated a transcript presence/absence matrix (1=present, 0=absent) using median CPM (counts-per-million, generated in edgeR) > 10 as the metric. Overlaps were visualized using the R package UpSet (Lex et al., 2014). Gene ontology enrichment analysis was carried out using the Kolmogorov-Smirnov test (Young, 1977) for significance in the R package, topGO (Alexa and Rahnenfuhrer, 2010). Lastly, the putative chromosomal location of differentially expressed genes was evaluated by using the *Gallus* genome version 5.0 as a reference.

# Results

## Sequence Read Data & Code Availability

In total, 20 hypothalamus (11 male, 9 female), 23 pituitary (14 male, 9 female), 13 testes, and 10 ovary samples from 23 birds were sequenced. Each sample was sequenced with between 2.3 million and 24.5 million read pairs. All read data are available using the project ID PRJEB16136. Code used for the analysis of these data are available at <https://git.io/vPA09>.

## Transcriptome Assembly and Evaluation

The Rock Dove transcriptome assembly consists of 88,011 transcripts (available here <https://goo.gl/PYrzas>, dryad on acceptance). This assembly, along with the annotations contained in gff3 format, is available at <https://goo.gl/DyZ8pw> (dryad on acceptance). The transcriptome contains 25,696 with at least 1 hit to the Pfam database, 46,854 hits to OrthoDB (Waterhouse et al., 2013), 51,522 hits to Uniref90, 3,108 hits to the transporter database (Saier et al., 2006), and 452 hits to Rfam (Griffiths-Jones et al., 2005). These 88,011 assembled transcripts map to 15,102 unique genes in the *Gallus* genome. The evaluation using BUSCO and TransRate are presented in Table 1 and 2 respectively.

Table 1: Quality control statistics for the assembled transcriptome: BUSCO metrics include statistics regarding the number of universal vertebrate single copy orthologs found in the assembly. 85.9% of the Avian BUSCOs were identified as full length (complete) sequences, while 4.3% were found to be fragmented. 27.5% were found in greater than 1 copy in the Rock Dove transcriptome.

|                 | BUSCO    |            |            |
|-----------------|----------|------------|------------|
|                 | Complete | Duplicated | Fragmented |
| Rock Dove 1.0.3 | 85.9%    | 27.5%      | 4.3%       |



Table 2: Quality control statistics for the assembled transcriptome: TransRate metrics are derived from mapping RNAseq reads to the assembly, with higher scores indicating a higher quality assembly. A score of 0.41 ranks this assembly higher than the majority of other published transcriptomes, with 90% of reads mapping, and only 2% of bases uncovered (no read support) and 0% contigs low-covered (mean per-base read coverage of < 10).

|                 | TRANSLATE |                   |               |                 |                         |                            |
|-----------------|-----------|-------------------|---------------|-----------------|-------------------------|----------------------------|
|                 | Score     | Number of Contigs | Assembly Size | Percent Mapping | Percent Bases Uncovered | Percent Contigs Lowcovered |
| Rock Dove 1.0.3 | 0.41      | 88011             | 146.8Mb       | 90              | 2                       | 0                          |

### ***Sequence Read Mapping and Estimation of Gene Expression.***

Raw sequencing reads corresponding to individual samples of hypothalami, pituitary glands, and gonads were mapped to the Rock Dove reference HPG transcriptome using Salmon, which resulted in between 70% and 80% read mapping. These mapping data were imported into R and summarized into gene-level counts using tximport, after which, edgeR was used to generate normalized estimates of gene expression. Patterns of transcript-expression overlap are presented in Figure 1. Of the 15,102 genes expressed in the HPG, 7,529 are expressed in all tissues (median CPM > 10 - Figure 1). A total of 746 transcripts are expressed in the ovary, hypothalamus, and pituitary, 732 are expressed uniquely in the testes, 529 uniquely in ovary, 418 uniquely in the hypothalamus, and 230 uniquely in the pituitary.



Figure 1. Description of transcript presence overlap in the HPG axis. Bars are annotated by connected dots which indicate a given number of transcripts expressed in those tissues. For example, 746 transcripts are expressed in the pituitary, hypothalamus, and ovary, but these genes are not expressed in the testes. Bars annotated by single blue dots indicate the number of transcripts expressed uniquely in that tissue. For example, 732 transcripts are expressed only in the testes.

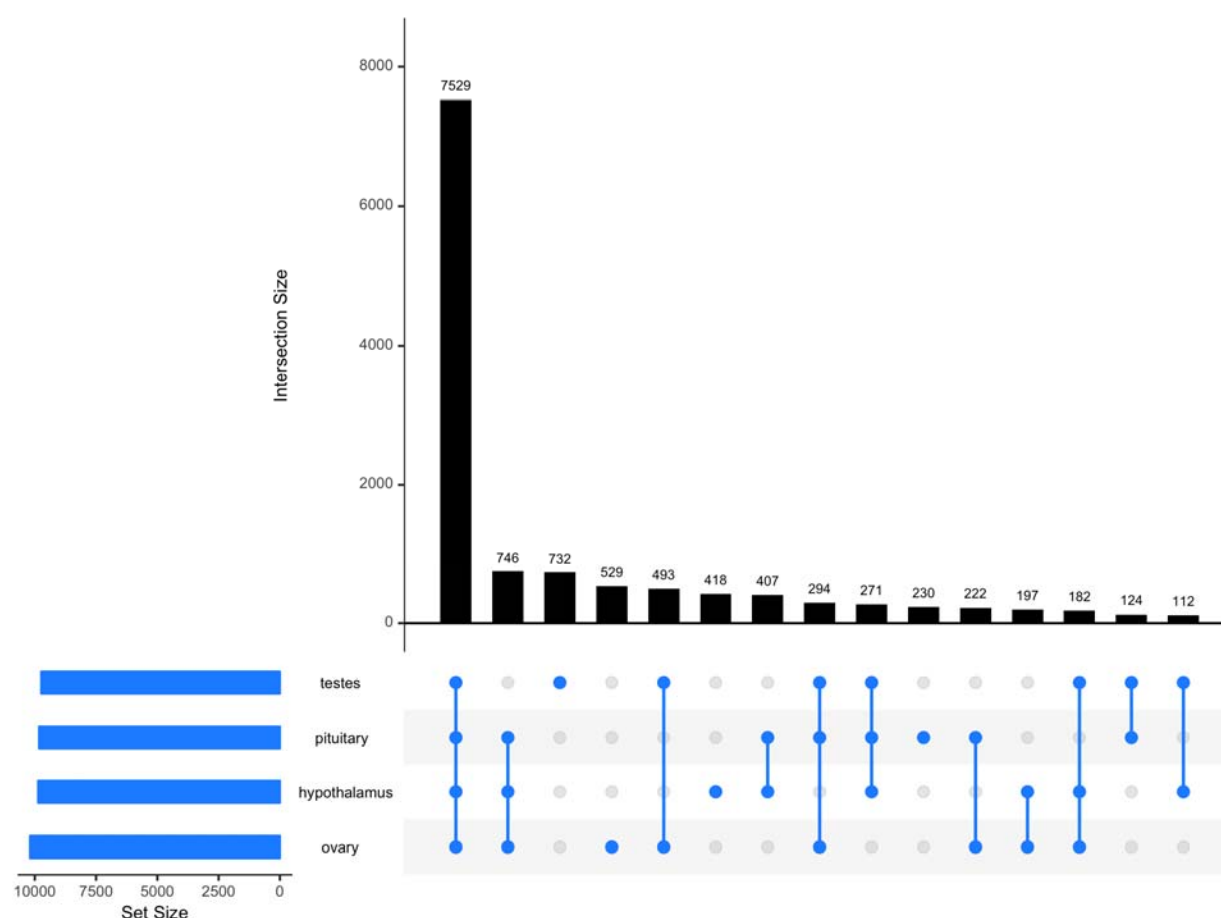

### Evaluation of Candidate Gene Expression.

Using the assembled transcriptome, we characterized expression in males and females across the HPG (e.g., Figure 2). For the candidate genes evaluated, which include gonadotropin releasing hormone (GnRH) and its receptor (GnRH-R), LH and its receptor (LH-R), FSH and its receptor (FSH-R), androgen receptor (AR), estrogen receptor alpha and beta (ESR alpha, ESR beta). In addition, we examined gonadotropin inhibitory hormone (GnIH), due to its inhibitory effect on the HPG axis and reproductive behavior (Calisi, 2014), vasoactive intestinal peptide

(VIP), due to its role in stimulating the release of the pituitary hormone, prolactin (Cloues et al., 1990), and its receptor (VIP-R), Prolactin (PRL) due to its facilitation of parental care behaviors, including crop milk production (Silver, 1984), and its receptor (PRL-R), arginine vasotocin receptor 1A and 1B (AVPR1A, AVPR1B), mesotocin (MT) and its receptor (MTR), due to their role in social bonding behaviors (Kelly and Goodson, 2014; Ondrasek, 2016), progesterone receptor (PGR) due to its role in reproductive behavior (Liley, 1976), CYP19, which encodes the aromatase enzyme (ARO), which is responsible for the conversion of testosterone into estradiol (Balthazart and Ball, 2012).

Using a generalized linear model and least-squares means for post-hoc tests of significance ( $P < 0.05$ ), we uncovered greater expression of GnRH-R, AR, and PGR in the female pituitary as compared to the male pituitary (z-ratio 2.324, p-value = 0.0201; z ratio = -3.842, p-value = 0.0001; z ratio = 5.559, p-value = <.0001, respectively). We also found greater expression of PRL in the female pituitary (z ratio = 2.912, p-value = 0.0036) as compared to the male pituitary, but PRL was more highly expressed in the male hypothalamus as compared to the female hypothalamus (z ratio = -2.433, p-value = 0.0150). The PRL receptor was also more highly expressed in the male hypothalamus and pituitary gland as compared to corresponding female tissues (z ratio -2.674, p-value = 0.0075 and z ratio -2.564, p-value = 0.0104, respectively). Finally, we discovered greater expression of AVPR1A in the male pituitary as compared to the female pituitary (z ratio = -2.416, p-value = 0.0157).

Figure 2A-F. Box and whisker plots illustrating the differential expression between the sexes of four candidate genes. The Y-axis indicates levels of gene expression as presented by taking the log of transcripts per million plus one (TPM+1) while tissue and sex are presented on the X-axis. The bottom and top of the box indicates the first and third quartiles. The band inside the box is the median. Whiskers indicate the 95% confidence intervals of the data. \*\* denotes statistically significant differences in expression.

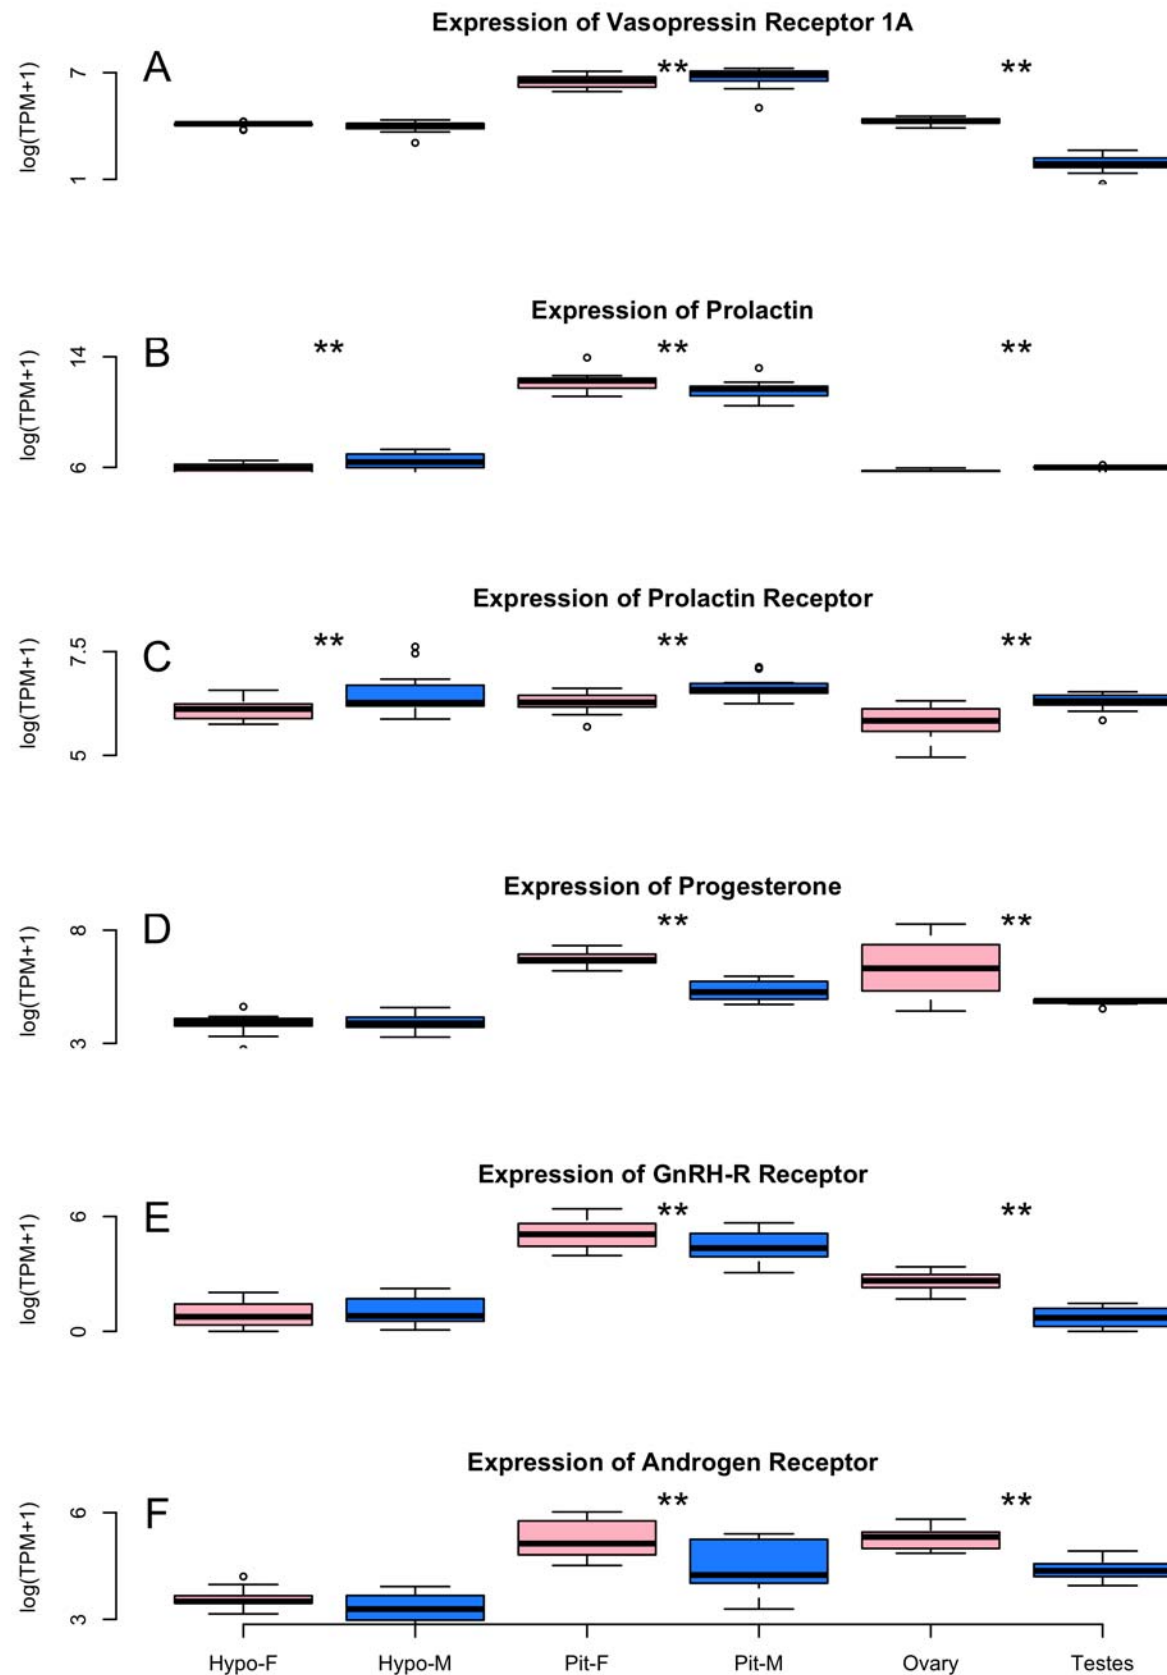

296 Table 3: Mean gene expression (normalized counts per million CPM) +/- standard deviation) for  
297 a list of candidate genes known to be important mediators of reproductive biology.

|                 | <b>Hypo</b>      |                  | <b>Pit</b>            |                       | <b>Gonads</b>    |                  |
|-----------------|------------------|------------------|-----------------------|-----------------------|------------------|------------------|
| <b>Gene</b>     | <b>Female</b>    | <b>Male</b>      | <b>Female</b>         | <b>Male</b>           | <b>Female</b>    | <b>Male</b>      |
| <b>GnRH-I</b>   | 116.1 +/- 75.9   | 142.3 +/- 121.6  | 0.3 +/- 0.5           | 1.3 +/- 2.3           | 0.6 +/- 0.7      | 1.2 +/- 1.1      |
| <b>GnRH-I-R</b> | 2.34 +/- 2.67    | 2.85 +/- 2.75    | 245.6 +/- 212.4       | 112.8 +/- 83.76       | 14.0 +/- 6.7     | 1.38 +/- 1.09    |
| <b>LH</b>       | 19.1 +/- 11.3    | 23.0 +/- 13.2    | 0.9 +/- 1.0           | 0.4 +/- 0.7           | 264.4 +/- 77.5   | 42.6 +/- 39.1    |
| <b>LH-R</b>     | 19.0 +/- 11.3    | 23.03 +/- 12.2   | 0.9 +/- 0.95          | 0.38 +/- 0.67         | 264.45 +/- 77.54 | 42.59 +/- 39.1   |
| <b>FSH</b>      | 4.0 +/- 4.4      | 5.1 +/- 2.6      | 9.4 +/- 3.8           | 11.5 +/- 5.6          | 151.6 +/- 80.2   | 181.0 +/- 51.6   |
| <b>FSH-R</b>    | 4.02 +/- 4.42    | 5.13 +/- 2.62    | 9.4 +/- 3.75          | 11.5 +/- 5.62         | 151.59 +/- 80.2  | 181.0 +/- 51.56  |
| <b>AR</b>       | 37.7 +/- 13.4    | 27.8 +/- 13.1    | 226.6 +/- 121.4       | 111.1 +/- 72.7        | 204.1 +/- 62.5   | 80.3 +/- 23.1    |
| <b>ERa</b>      | 49.2 +/- 14.0    | 57.2 +/- 18.6    | 724.5 +/- 329.3       | 836 +/- 283.4         | 166.2 +/- 152.5  | 64.6 +/- 32.6    |
| <b>ERb</b>      | 41.9 +/- 18.7    | 36.1 +/- 14.5    | 53.8 +/- 16.5         | 58.6 +/- 27.9         | 173.4 +/- 90.5   | 7.4 +/- 3.9      |
| <b>GnIH</b>     | 287.8 +/- 148.7  | 383.2 +/- 510.0  | 4.0 +/- 3.8           | 2.9 +/- 3.1           | 0.1 +/- 0.2      | 0.7 +/- 0.7      |
| <b>VIP</b>      | 1.3e+02 +/- 60.1 | 1.3e+02 +/- 98.3 | 1.19 +/- 1.37         | .46 +/- .77           | 1.3e+01 +/- 15.6 | 0 +/- 0          |
| <b>VIP-R</b>    | 70.78 +/- 18.5   | 69.2 +/- 24.5    | 47.3 +/- 141.5        | 376.35 +/- 134.64     | 42.3 +/- 17.3    | 18.8 +/- 7.9     |
| <b>PRL</b>      | 389.9 +/- 170.4  | 766.0 +/- 436.7  | 295840.2 +/- 320026.2 | 136607.5 +/- 121634.2 | 250.9 +/- 95.2   | 397.9 +/- 45.1   |
| <b>PRL-R</b>    | 463.0 +/- 141.7  | 803.4 +/- 558.4  | 540.4 +/- 143.2       | 790.85 +/- 204        | 338.5 +/- 131.8  | 550.66 +/- 100.7 |
| <b>AVPR1A</b>   | 117.3 +/- 58.8   | 98.3 +/- 34.4    | 202.2 +/- 111.3       | 362.2 +/- 181.6       | 19.0 +/- 13.5    | 3.2 +/- 2.3      |
| <b>AVPR1B</b>   | 5.4 +/- 5.4      | 5.4 +/- 3.1      | 1538.3 +/- 503.5      | 1900.1 +/- 709.1      | 3.8 +/- 1.3      | 2.3 +/- 1.5      |
| <b>MT</b>       | 264.9 +/- 82.1   | 206.9 +/- 101.1  | 173 +/- 39.9          | 172.78 +/- 60.9       | 182.11 +/- 265.4 | 11.1 +/- 2.98    |
| <b>MTR</b>      | <1               | <1               | <1                    | <1                    | <1               | <1               |
| <b>PGR</b>      | 50.6 +/- 24.6    | 51.4 +/- 20.8    | 874.4 +/- 294.9       | 216.7 +/- 82.6        | 1004.6 +/- 1193  | 126.7 +/- 14.4   |
| <b>CYP19</b>    | 212.6 +/- 137.5  | 325.8 +/- 200.2  | 26.4 +/- 10.3         | 49.5 +/- 20.2         | 786.6 +/- 446.2  | 1.7 +/- 1.3      |

## **Global Evaluation of Gene Expression**

Analysis of global patterns of gene expression, aimed at uncovering previously unknown sex-specific differences in gene expression in the hypothalamus and pituitary by examining the entire transcriptome, was conducted using edgeR. After controlling for over 15,000 multiple comparisons, we normalized the count data using the TMM method (McCarthy et al., 2012), which is done by finding a set of scaling factors for the library sizes that minimize the log-fold changes between the samples for most genes. This analysis revealed sex-specific differences in gene expression, particularly in the pituitary, where 119 genes were more highly expressed in males, while 124 genes were more highly expressed in females (Figure 3). The five most differentially expressed genes are Zinc Finger AN1-Type Containing 5 (ZFAND5), Betacellulin (BTC) which appears to be responsive to LH (Park et al., 2004; Fig. 4), CITED4 (Cbp/P300 Interacting Transactivator With Glu/Asp Rich Carboxy-Terminal Domain 4), GREB1 (Growth Regulation By Estrogen In Breast Cancer 1) which is regulated by estrogen (Ghosh et al., 2000), and KIF24 (Kinesin Family Member 24). All had false discovery rates (FDR) < 7e-09. The full table of differentially expressed genes is available at <https://git.io/vXJWp>, which includes several tantalizing novel candidates, including Ecto-NOX Disulfide-Thiol Exchanger 1 (ENOX1; Fig. 4). In contrast to the pituitary, the hypothalamus exhibited only a single differentially expressed gene. That gene was potassium voltage-gated channel subfamily Q member 1 (KCNQ1, FDR = 0.007). KCNQ1, which we found to be more highly expressed in females, is known to be imprinted (expressed in a parent-of-origin-specific manner) in mammals (Lee et al., 1997).

A number of expression patterns in the pituitary were identified by gene ontology analysis, which uses a controlled vocabulary to describe gene function and relationships between these terms. First, gene ontology terms that describe genes differentially expressed in the female pituitary (Table 4) are clustered around terms related to the binding of lipid-based hormones, immune function, growth, and development. Gene ontology terms from genes differentially expressed in male pituitary (Table 5) are clustered around terms related to muscles and movement.

Figure 3. MA plot for the *ab initio* comparison between genes differentially expressed in the male and female pituitary. Red dots indicate statistically different genes. Those with positive values on the log fold change (logFC) Y axis are more highly expressed in the male pituitary, while those with negative values are more highly expressed in the female pituitary. The x-axis is a measure of gene expression, with higher numbers indicating higher levels of gene expression.

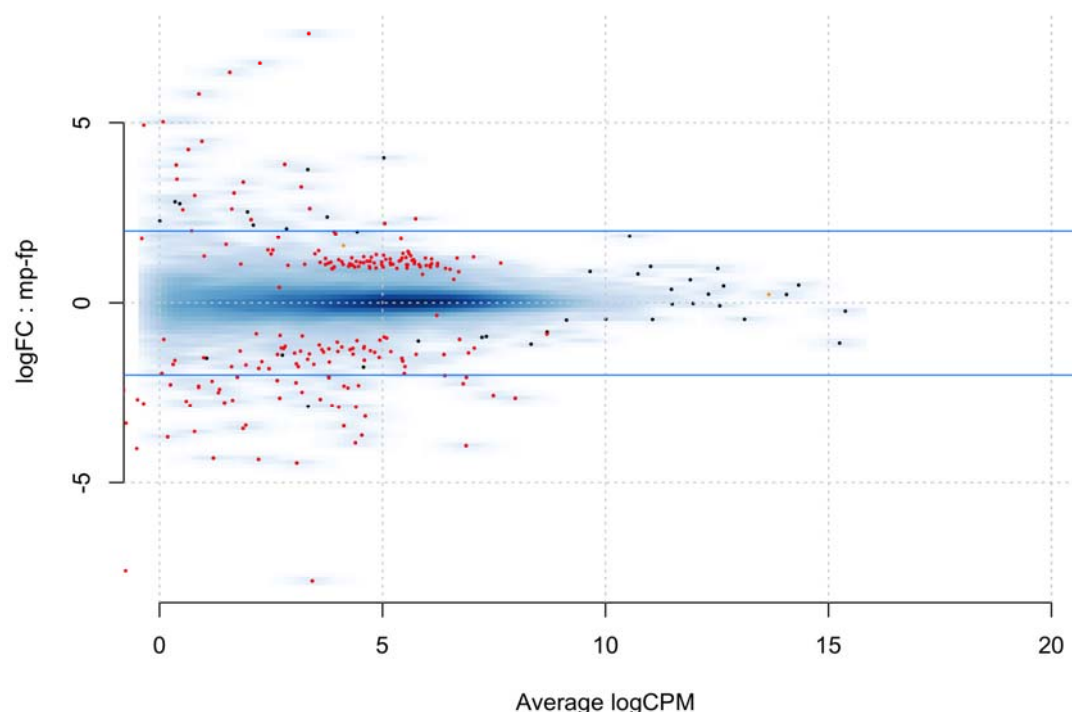

Figure 4. Box and whisker plots illustrating sex-biased expression of two genes, Betacellulin (BTC) and Ecto-NOX Disulfide-Thiol Exchanger 1 (ENOX1), identified using our global analysis. The Y-axis indicates levels of gene expression as presented by taking the log of transcripts per million plus one (TPM+1) while tissue and sex are presented on the X-axis. The bottom and top of the box indicates the first and third quartiles. The band inside the box is the median. Whiskers indicate the 95% confidence intervals of the data. \*\* denotes statistically significant differences in expression.

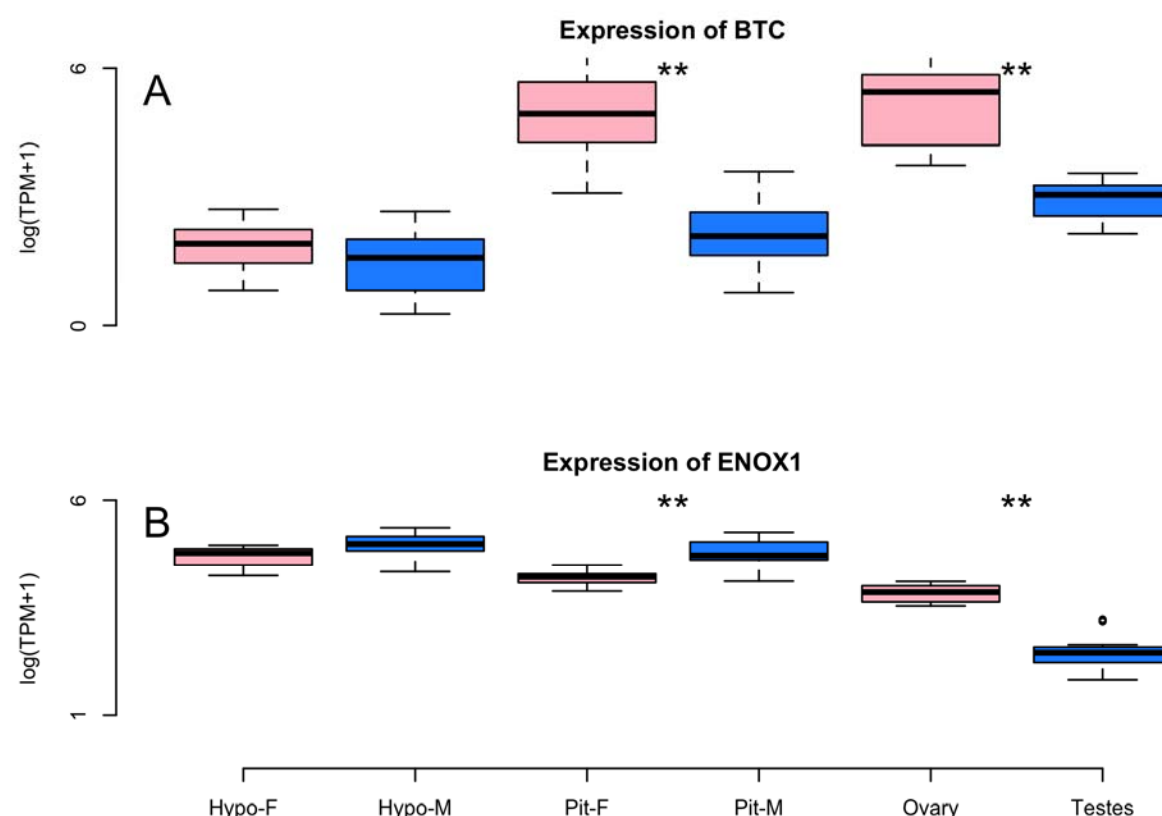



**Table 4: Top 20 Gene Ontology (GO) Terms** describing differentially expressed genes in the female pituitary gland. These terms describe the putative function of genes using a controlled vocabulary. Abbreviations: Ontology (Ont), Molecular Function (MF), Biological Processes (BP). N signifies the number of genes in the entire dataset that are linked to the specific ontology term. F+ indicates the number of differentially expressed genes significantly upregulated in the female pituitary, while M+ indicates the number of expressed genes significantly upregulated in the male pituitary. Results are limited to terms where the specific term contains >4 genes.

| GO number         | Term                                                  | Ont | N   | F+ | M+ | P-value  |
|-------------------|-------------------------------------------------------|-----|-----|----|----|----------|
| <b>GO:0008289</b> | lipid binding                                         | MF  | 50  | 6  | 1  | 1.92E-05 |
| <b>GO:0048469</b> | cell maturation                                       | BP  | 13  | 3  | 0  | 4.29E-04 |
| <b>GO:0021700</b> | developmental maturation                              | BP  | 18  | 3  | 0  | 1.18E-03 |
| <b>GO:0043178</b> | alcohol binding                                       | MF  | 7   | 2  | 0  | 2.93E-03 |
| <b>GO:0033293</b> | monocarboxylic acid binding                           | MF  | 8   | 2  | 0  | 3.88E-03 |
| <b>GO:0014066</b> | regulation of phosphatidylinositol 3-kinase signaling | BP  | 8   | 2  | 0  | 3.88E-03 |
| <b>GO:0006869</b> | lipid transport                                       | BP  | 27  | 3  | 2  | 3.92E-03 |
| <b>GO:0007548</b> | sex differentiation                                   | BP  | 27  | 3  | 0  | 3.92E-03 |
| <b>GO:0010876</b> | lipid localization                                    | BP  | 29  | 3  | 2  | 4.82E-03 |
| <b>GO:0048017</b> | inositol lipid-mediated signaling                     | BP  | 9   | 2  | 0  | 4.95E-03 |
| <b>GO:0014065</b> | phosphatidylinositol 3-kinase signaling               | BP  | 9   | 2  | 0  | 4.95E-03 |
| <b>GO:0048015</b> | phosphatidylinositol-mediated signaling               | BP  | 9   | 2  | 0  | 4.95E-03 |
| <b>GO:0005496</b> | steroid binding                                       | MF  | 9   | 2  | 0  | 4.95E-03 |
| <b>GO:0005319</b> | lipid transporter activity                            | MF  | 10  | 2  | 1  | 6.14E-03 |
| <b>GO:0043627</b> | response to estrogen                                  | BP  | 10  | 2  | 0  | 6.14E-03 |
| <b>GO:0004867</b> | serine-type endopeptidase inhibitor activity          | MF  | 12  | 2  | 0  | 8.86E-03 |
| <b>GO:0042698</b> | ovulation cycle                                       | BP  | 13  | 2  | 0  | 1.04E-02 |
| <b>GO:0022602</b> | ovulation cycle process                               | BP  | 13  | 2  | 0  | 1.04E-02 |
| <b>GO:0005102</b> | receptor binding                                      | MF  | 114 | 5  | 0  | 1.07E-02 |
| <b>GO:0046545</b> | development of primary female sexual characteristics  | BP  | 14  | 2  | 0  | 1.20E-02 |

**Table 5: Gene Ontology (GO) Terms** describing genes differentially expressed genes in the male pituitary gland. These terms describe the putative function of genes using a controlled vocabulary. Abbreviations: Ont= Ontology (Ont), MF (Molecular Function (MF), BP (Biological Processes (BP). N signifies= the number of genes in the entire dataset that are linked to the specific ontology term. F+ indicates the number of differentially expressed genes significantly upregulated in the female pituitary, while M+ indicates the number of expressed genes significantly upregulated in the male pituitary. Results are limited to terms where the specific term contains >4 genes.

| GO number         | Term                              | Ont | N   | F+ | M+ | P-value  |
|-------------------|-----------------------------------|-----|-----|----|----|----------|
| <b>GO:0006936</b> | muscle contraction                | BP  | 21  | 0  | 4  | 3.90E-04 |
| <b>GO:0006941</b> | striated muscle contraction       | BP  | 10  | 0  | 3  | 5.53E-04 |
| <b>GO:0003012</b> | muscle system process             | BP  | 26  | 0  | 4  | 9.15E-04 |
| <b>GO:0050879</b> | multicellular organismal movement | BP  | 4   | 0  | 2  | 1.77E-03 |
| <b>GO:0050881</b> | musculoskeletal movement          | BP  | 4   | 0  | 2  | 1.77E-03 |
| <b>GO:0003009</b> | skeletal muscle contraction       | BP  | 4   | 0  | 2  | 1.77E-03 |
| <b>GO:0008092</b> | cytoskeletal protein binding      | MF  | 101 | 1  | 6  | 7.20E-03 |
| <b>GO:0003779</b> | actin binding                     | MF  | 53  | 0  | 4  | 1.28E-02 |

## Discussion

The HPG axis is a system comprised of endocrine glands whose function is vital to the regulation of reproduction and associated behavior. Here, we report patterns of gene expression amongst tissues of the HPG axis as well as patterns of sex-biased gene expression within them. We described patterns of tissue-specific expression and shared incidence of expression between tissues, providing an important picture of the functional-connectivity of these tissues. We also described sex-biased patterns of gene expression for a set of candidate genes, currently known to play important roles in reproduction and associated behaviors. Lastly, we used an *ab initio* approach to identify all differentially expressed transcripts between male and female pituitary and hypothalamus. Our findings can provide 1) a vital resource for behavioral biologists examining the molecular basis of reproductive behavior, and 2) fodder for researchers

investigating the mechanisms underlying fundamental physiological and behavioral differences in males and females.

***The Columba livia HPG transcriptome.*** We present an HPG transcriptome that is substantially complete, with fewer than 10% of universal avian orthologs missing (Table 1). This number suggests that all, or nearly all, transcripts present in the avian HPG have been successfully reconstructed, and the missing avian orthologs may be expressed in tissues other than those studied here. The transcriptome is structurally sound, as is evident from its TransRate score of .41, with 90% of reads mapping concordantly to the assembled reference (Table 2).

Our analysis of patterns of gene expression (Figure 1) revealed that nearly half of all genes expressed anywhere in the HPG axis are expressed ubiquitously. Of transcripts that are expressed uniquely in one tissue, the testis contains the most (n=746), followed by the ovary (n=529), hypothalamus (n=418), and pituitary (n=230). Interestingly, dyads (genes expressed only in pairs of tissues) follow an expected pattern, with the number of genes expressed uniquely in the gonads (testes + ovary) being more than the number of genes expressed uniquely in the pituitary and hypothalamus, followed by the pituitary and ovary, hypothalamus and ovary, pituitary and testes, and hypothalamus and testes dyads.

***Evaluation of Candidate Gene Expression.*** Decades of previous research describing the HPG axis and its role in reproductive biology have elucidated much of the molecular machinery underlying phenotypes (Nelson and Kriegsfeld, 2017). Based on this previous work, we targeted well-known substrates involved in the facilitation and mediation of reproductive processes and their associated behaviors for investigation (Table 3). Other genes not highlighted here can be found in our supplementary materials.

We discovered previously unrecognized sex-specific differences in several of these candidate genes. Arginine vasopressin receptor 1A (AVPR1A), the receptor to which Arginine vasopressin (AVP) binds, is known to be implicated in reproductive behaviors such as pair-bonding and parental care (Walum et al., 2008; Turner et al., 2010; Castelli et al., 2011; Staes et al., 2015). AVPR1A is most highly expressed in the pituitary, followed by the ovary, the hypothalamus, and lastly the testes. We found statistically significant differences in expression of this gene in the pituitary, with expression of this gene to be 1.8x higher in males as compared to females. Although a small number of studies have investigated sex-specific differences in

gene expression (Nishida et al., 2005; Shan et al., 2013; Trabzuni et al., 2013), including one in which expression in males was linked to pair-bond formation (Lim et al., 2004), AVPR1A has not been previously identified as differentially expressed by sex. As fields of behavior and genomics further integrate, links between sex-specific roles in pair-bonding and reproductive behavior in the context of corresponding differences in gene expression will transform the way we understand how behavior is regulated.

We also investigated other candidate genes involved in reproduction and associated behaviors. Prolactin (PRL) is an important promoter of parental care, promoting lactation (Angelier and Chastel, 2009) and related to appetite and weight gain (Buntin et al., 1999). We found PRL to be more highly expressed in the male hypothalamus as compared to the female hypothalamus. The receptor for prolactin (PRL-R) was also more highly expressed in the male hypothalamus and pituitary as compared to females. In contrast, PRL was more highly expressed in the female pituitary as compared to the male pituitary. Though this species exhibits bi-parental care, including the production of crop milk by both males and females, neither sex was caring for eggs or chicks at the time of collection to help control for potential reproductive stage confounds. However, the interesting sexually-biased differences we note in inter-tissue gene expression inspires the question as to whether PRL is regulated in a sex-specific manner to produce a sex-specific result? Or, despite the difference in location of expression, does PRL activation lead to sexually monomorphic prolactin-mediated reproductive processes and behaviors? Post our discovery that PRL expression differs relative to sex and tissue of the HPG axis, the next step would be to investigate how the action of PRL on each of these tissues manifests in males versus females.

In addition, we found GnRH-R, AR, and PRG to more highly expressed in the female pituitary as compared to the male pituitary. GnRH, produced in the hypothalamus, is a major mediator of gonadotropin release in the pituitary, where these receptors are upregulated in females as compared to males. These gonadotropins signal the gonads to produce androgens, which feedback onto their receptors along the HPG axis. Here, we see those receptors are upregulated in females as compared to males. Females tend to have lower circulation of androgens than males, so could this be a way to increase sensitivity to androgen signals in females? Finally, progesterone is associated with the mediation of female breeding cycles (Askew et al., 1997), but it can also serve as an important precursor to the creation of multiple hormones in males and females, including testosterone and estradiol. We found that the

androgen receptor is more highly expressed in the female pituitary relative to the male pituitary. While expression in both sexes has been linked to reproductive development (Wacker et al., 2010; Walters et al., 2012; Chang et al., 2013), to our knowledge, sex differences in expression have never been reported. To better elucidate the phenomenon of these sexually-dimorphic genetic expression phenotypes, further studies of functional genomics are required. Indeed, study of the most well-characterized candidate genes underlying reproductive behavior could reveal important and previously unrecognized sex-differences in expression. As the field of behavioral genomics advances, important questions to ask will be, are these differences biologically relevant, and if so, how do differences in expression lead to differences in behavior and reproductive output? Future work focused on these relationships will significantly shape our understanding of the molecular mechanisms underlying the observed patterns.

**Global Evaluation of Gene Expression.** Avian reproductive behavior has been shown to be heavily influenced by the endocrine function of the hypothalamus, pituitary, and gonads. Although sex-biased differences in vertebrate reproductive behavior have been well-noted, data on sex-specific patterns of gene expression that could be influencing these behaviors are lacking. This may largely be due to the novelty of various genomic technologies and the expense of collecting such data. However, it is becoming increasingly feasible and affordable to conduct such studies, making possible the potential for a more integrative understanding of reproductive behavior (Calisi and MacManes, 2015). Thus, in addition to investigating sexually dimorphic candidate gene expression in the HPG axis, we used an *ab initio* RNAseq approach to explore differences in *all* sexually dimorphic HPG gene expression in each tissue. The newly discovered sex-biased genetic differences that we report have the potential to offer a more in-depth picture of sexual dimorphism at the molecular level.

To conduct a global analysis of gene expression, we compared levels of expression in the tissues of the HPG shared by both sexes, the pituitary glands and hypothalami. Unlike our previous analyses where we targeted genes of interest, here we analyzed all genes expressed, controlling for over 15,000 multiple comparisons. We uncovered 233 sex-based differentially-expressed genes in the pituitary: 119 were more highly expressed in males, while 124 were more highly expressed in females. A table detailing differences in expression of all expressed genes, including those statistically and non-statistically differentially expressed, can be accessed at <https://git.io/vXJWp>. In contrast, only a single gene, the potassium voltage-gated channel subfamily Q member 1 (KCNQ1), was statistically differentially expressed in the

hypothalamus (full table available here <https://git.io/vXJW5>). This profound disparity in patterns of differential expression between hypothalamic and pituitary tissues begs a question of function - how do the different tissues of the HPG axis contribute to physiological and behavioral differences between males and females? Is the pituitary more involved in the maintenance of sex-specific physiology and behavior than the hypothalamus? Studies comparing gene expression in males and females are rare - most often studies have combined the sexes (but see (Nishida et al., 2005; Weickert et al., 2009; Zhang et al., 2011; Balakrishnan et al., 2012; Sun et al., 2012; Shan et al., 2013; Trabzuni et al., 2013; Jansen et al., 2014; Hodes et al., 2015). However, Nishida and colleagues (Nishida et al., 2005) found similar patterns of gene expression in mice, reporting that 43 genes were more highly expressed in the female pituitary while only 3 were more highly expressed in the hypothalamus as compared to males. Could this pattern of sex-biased expression be conserved across vertebrates, and if so, can we conclude that the pituitary, more so than the hypothalamus, plays a greater role in the maintenance of sex-specific reproductive physiology and behavior?

Gene ontology analysis of the differential expression in the pituitary revealed interesting patterns of enrichment, meaning it revealed interesting patterns of gene expression related to a common biological function or process. Gene ontology terms enriched for genes expressed more highly in males were often related to motor function. In contrast, ontology terms in genes more highly expressed in females aligned more closely with growth and development processes. These differences may reflect fundamental differences in male versus female life strategies, where males may invest more heavily in immediate payoff activities, while females may invest more in longer-term payoff events. Rock doves are socially monogamous and offer bi-parental care, making them behaviorally similar in many ways. However, mate choice among rock doves is complex with many factors such as social dominance, age, reproductive experience, size, parasite load, and color morph contributing to selection (Burley, 1981; Johnston and Johnson, 1989; Clayton, 1990). Females are the choosier sex (Burley, 1981), and males engage in extensive courtship displays to attract and secure a pair bond (Goodwin 1983). These displays include “bow-coos”, assuming an upright posture, inflating the crop, strutting, and tail dragging (Abs, 1983), displays that likely indicate some measure of male quality (Fusani et al., 2014). A display flight may also be undertaken where males fly from a perch and clap their wings several times prior to gliding, with wings raised and tail spread (Goodwin 1983). A study on the aerodynamics of a similar display flight in Eurasian collared doves, *Streptopelia decaocto*, suggests that high muscle power is required for this type of sexual display



(Usherwood, 2008). These flights were not energetically expensive, accounting for approximately 5% of basal metabolic rate, and may be a relatively inexpensive display to indicate male health. Indeed, recent work suggests that neuromuscular control may be used by females to select mates (Fusani et al., 2014). Male golden-collared manakins engage in elaborate displays that require extremely fine-tuned neuromuscular control. Neuromuscular sex differences seem to require androgenic and estrogenic signals to certain skeletal muscles which readies these tissues for courtship behaviors (Fusani et al., 2014). Males also engage in physical activities such as mate-guarding and “driving” behaviors, which may be a means of preventing extra pair copulations (Lovell-Mansbridge and Birkhead, 1998). Because of these physically demanding events, our assessment of gene ontology terms enriched for genes more highly expressed in males seems to support this idea that differential expression could be related to motor function associated with male reproductive behaviors, and this function could be regulated more heavily by the pituitary as compared to the hypothalamus.

Gene ontology terms enriched for genes expressed more highly in the female pituitary were often related to aspects of female growth and development. This may be due to their varying stages of follicular development. Females, unlike males, must grow and maintain follicles and the oviduct, which is energetically costly (Vézina et al., 2003). In a passerine species, females increased their resting metabolic rate by 22% during egg laying, of which 18% was attributed to maintenance of the oviduct (Vézina et al., 2003). While birds in our study were not actively nesting, we could not control for reproductive stage of the gonads. When we extracted female gonads, we found that they were experiencing different stages of follicular development. Some birds had regressed follicles, but many had a follicular hierarchy. The presence of follicular hierarchy could explain the presence of gene ontologies related to ovulation. Similarly, lipid binding and transport may be associated with follicular development because females are laying down lipid-rich yolk. On the other hand, males never had regressed testes. The active state of the male gonads is typical of pigeons who breed year-round, except for a brief photorefractory period in the North temperate fall where they may regress (Murton and Westwood, 1977). Gonads of females are more plastic and vary with the presence of suitable mates and breeding stage (Murton and Westwood 1977).

Using the global analysis approach, we were able to identify sex-biased differentially expressed genes that have not previously been targeted for investigation of HPG function. Such findings that are yielded from this discovery-based approach offer promising targets for future study,



inspiring new lines of investigation (Calisi and MacManes, 2015). One particularly promising target for understanding sex differences in reproductive biology is Betacellulin (BTC), which is highly expressed in the female pituitary as compared to the male pituitary (4.4 FC - Figure 4A). BTC is an epidermal-like growth hormone known to regulate female reproduction (Gratao et al., 2008) via mediation of LH (Park et al., 2004) and regulation of progesterone receptors (Shimada et al., 2006). In addition to being differentially expressed in the pituitary, it is also highly expressed in the female ovary, but not the hypothalamus. It is lowly expressed, but present in all male tissues, which begs the question, what role could BTC have in male reproductive physiology, if any?

The Ecto-NOX Disulfide-Thiol Exchanger 1 (ENOX1) gene, an electron transport gene, is more highly expressed in the male pituitary relative to the female pituitary (1.2x FC - Figure 4B). This gene, known to be involved in circadian rhythms (Dick et al., 2013), has also been associated with weight gain (Serão et al., 2013), litter size in the pig (Sell-Kubiak et al., 2015), and eggshell thickness in a genome-wide association study (GWAS) of chickens (Liu et al., 2011). What role this gene plays in the pituitary, and specifically in the male pituitary, where it is differentially expressed, is completely unclear. Further work aimed at understanding this and the other differentially expressed genes can be the key to gaining the most complete understanding yet of how the HPG axis functions.

## **Summary**

Neurobiologists have described many important characteristics of the molecular basis for reproductive behaviors, including the characterization of multiple genes expressed in the HPG axis that are critical to reproduction. Our sex-specific, global analyses have uncovered hundreds of sexually-biased genes. These genes provide novel clues to assist behavioral biologists and functional genomicists in more fully understanding the mechanisms underlying sexual dimorphism in reproductive behaviors. Indeed, future work can now use this information to better understand causal relationships and functions of genes expressed differently in males and females.

In conclusion, we reveal patterns of tissue specific and sexually dimorphic gene expression in the HPG axis. We report sex-biased expression in genes commonly investigated when studying reproduction. In addition, we offer up promising new targets of investigation that could lead to a better understanding of HPG function in both sexes. Our results highlight the need for sex parity

in transcriptomic studies, providing new lines of investigation of the mechanisms of reproductive function.

# **Acknowledgements:**

We thank Natalia Duque for her illustration used in Fig. 1. This work is supported by NSF IOS 1455960 to RMC and MM. We also thank Jesse Krause, Jonathan Pérez, and members of the Calisi Lab for their help in maintaining the pigeon aviaries and aiding in tissue collection.

# **REFERENCES**

- Abs M (1983) Physiology and Behaviour of the Pigeon. Academic Press. Available at: <http://agris.fao.org/agris-search/search.do?recordID=US201300359288>.
- Alexa A, Rahnenfuhrer J (2010) topGO: enrichment analysis for gene ontology. R package version 2 Available at: <http://bioconductor.uib.no/2.7/bioc/html/topGO.html>.
- Andrews SR (2016) FastQC. Available at: <http://www.bioinformatics.babraham.ac.uk/projects/fastqc/>.
- Angelier F, Chastel O (2009) Stress, prolactin and parental investment in birds: a review. Gen Comp Endocrinol 163:142–148 Available at: <http://dx.doi.org/10.1016/j.ygcen.2009.03.028>.
- Askew JA, Georgiou GC, Sharp PJ, Lea RW (1997) Localization of progesterone receptor in brain and pituitary of the ring dove: influence of breeding cycle and estrogen. Horm Behav 32:105–113 Available at: <http://dx.doi.org/10.1006/hbeh.1997.1411>.
- Balakrishnan CN, Lin Y-C, London SE, Clayton DF (2012) RNA-seq transcriptome analysis of male and female zebra finch cell lines. Genomics 100:363–369 Available at: <http://www.sciencedirect.com/science/article/pii/S0888754312001620>.
- Balthazart J, Ball G (2012) Brain Aromatase, Estrogens, and Behavior. OUP USA. Available at: <https://books.google.com/books?id=VPpMAgAAQBAJ>.
- Buntin JD, Hnasko RM, Zuzick PH (1999) Role of the ventromedial hypothalamus in prolactin-induced hyperphagia in ring doves. Physiol Behav 66:255–261 Available at: <https://www.ncbi.nlm.nih.gov/pubmed/10336151>.
- Burley N (1981) MATE CHOICE BY MULTIPLE CRITERIA IN A MONOGAMOUS SPECIES. Am Nat 117:515–528.
- Calisi RM (2014) An integrative overview of the role of gonadotropin-inhibitory hormone in behavior: Applying Tinbergen’s four questions. Gen Comp Endocrinol 203:95–105 Available at: <http://www.sciencedirect.com/science/article/pii/S0016648014001026>.
- Calisi RM, MacManes MD (2015) RNAseq-ing a more integrative understanding of animal

- 642 behavior. *Current Opinion in Behavioral Sciences* 6:65–68 Available at:  
643 <http://www.sciencedirect.com/science/article/pii/S2352154615001230>.
- 644 Camacho C, Coulouris G, Avagyan V, Ma N, Papadopoulos J, Bealer K, Madden TL (2009)  
645 BLAST+: architecture and applications. *BMC Bioinformatics* 10:421 Available at:  
646 <http://www.biomedcentral.com/1471-2105/10/421>.
- 647 Cánovas A, Reverter A, DeAtley KL, Ashley RL, Colgrave ML, Fortes MRS, Islas-Trejo A,  
648 Lehnert S, Porto-Neto L, Rincón G, Silver GA, Snelling WM, Medrano JF, Thomas MG  
649 (2014) Multi-tissue omics analyses reveal molecular regulatory networks for puberty in  
650 composite beef cattle. *PLoS One* 9:e102551 Available at:  
651 <http://dx.doi.org/10.1371/journal.pone.0102551>.
- 652 Castelli FR, Kelley RA, Keane B, Solomon NG (2011) Female prairie voles show social and  
653 sexual preferences for males with longer avpr1a microsatellite alleles. *Anim Behav* 82:1–10  
654 Available at: <http://dx.doi.org/10.1016/j.anbehav.2011.08.006>.
- 655 Chang C, Lee SO, Wang R-S, Yeh S, Chang T-M (2013) Androgen receptor (AR) physiological  
656 roles in male and female reproductive systems: lessons learned from AR-knockout mice  
657 lacking AR in selective cells. *Biol Reprod* 89:21 Available at:  
658 <http://dx.doi.org/10.1095/biolreprod.113.109132>.
- 659 Clayton DH (1990) Mate Choice in Experimentally Parasitized Rock Doves: Lousy Males Lose.  
660 *Am Zool* 30:251–262 Available at: <http://az.oxfordjournals.org/content/30/2/251.abstract>  
661 [Accessed November 2, 2016].
- 662 Cloues R, Ramos C, Silver R (1990) Vasoactive intestinal polypeptide-like immunoreactivity  
663 during reproduction in doves: influence of experience and number of offspring. *Horm Behav*  
664 24:215–231 Available at: <https://www.ncbi.nlm.nih.gov/pubmed/2194925>.
- 665 Dhillon WS, Chaudhri OB, Patterson M, Thompson EL, Murphy KG, Badman MK, McGowan BM,  
666 Amber V, Patel S, Ghatei MA, Bloom SR (2005) Kisspeptin-54 stimulates the hypothalamic-  
667 pituitary gonadal axis in human males. *J Clin Endocrinol Metab* 90:6609–6615 Available at:  
668 <http://dx.doi.org/10.1210/jc.2005-1468>.
- 669 Dick SS, Ryuzoji A, Morré DM, Morré DJ (2013) Identification of the constitutive ultradian  
670 oscillator of the circadian clock (ENOX1) in *Saccharomyces cerevisiae*. Available at:  
671 [http://file.scirp.org/Html/6-1350145\\_33573.htm](http://file.scirp.org/Html/6-1350145_33573.htm).
- 672 Fusani L, Barske J, Day LD, Fuxjager MJ, Schlinger BA (2014) Physiological control of  
673 elaborate male courtship: female choice for neuromuscular systems. *Neurosci Biobehav*  
674 Rev 46 Pt 4:534–546 Available at: <http://dx.doi.org/10.1016/j.neubiorev.2014.07.017>.
- 675 Ghosh MG, Thompson DA, Weigel RJ (2000) PDZK1 and GREB1 are estrogen-regulated  
676 genes expressed in hormone-responsive breast cancer. *Cancer Res* 60:6367–6375  
677 Available at: <https://www.ncbi.nlm.nih.gov/pubmed/11103799>.
- 678 Gratao AA, Dahlhoff M, Sinowatz F, Wolf E, Schneider MR (2008) Betacellulin overexpression  
679 in the mouse ovary leads to MAPK3/MAPK1 hyperactivation and reduces litter size by  
680 impairing fertilization. *Biol Reprod* 78:43–52 Available at:  
681 <http://dx.doi.org/10.1095/biolreprod.107.062588>.

682 Griffiths-Jones S, Moxon S, Marshall M, Khanna A, Eddy SR, Bateman A (2005) Rfam:  
683 annotating non-coding RNAs in complete genomes. *Nucleic Acids Res* 33:D121–D124  
684 Available at: <http://dx.doi.org/10.1093/nar/gki081>.

685 Haas BJ et al. (2013) De novo transcript sequence reconstruction from RNA-seq using the  
686 Trinity platform for reference generation and analysis. *Nat Protoc* 8:1494–1512 Available at:  
687 <http://www.nature.com/doifinder/10.1038/nprot.2013.084>.

688 Han H, Sun Z, Luo G, Wang C, Wei R, Wang J (2015) Fluoride exposure changed the structure  
689 and the expressions of reproductive related genes in the hypothalamus-pituitary-testicular  
690 axis of male mice. *Chemosphere* 135:297–303 Available at:  
691 <http://dx.doi.org/10.1016/j.chemosphere.2015.04.012>.

692 Hodes GE et al. (2015) Sex Differences in Nucleus Accumbens Transcriptome Profiles  
693 Associated with Susceptibility versus Resilience to Subchronic Variable Stress. *J Neurosci*  
694 35:16362–16376 Available at: <http://www.jneurosci.org/content/35/50/16362.long>  
695 [Accessed October 25, 2016].

696 Jansen R, Batista S, Brooks AI, Tischfield JA, Willemsen G, van Grootheest G, Hottenga J-J,  
697 Milaneschi Y, Mbarek H, Madar V, Peyrot W, Vink JM, Verweij CL, de Geus EJC, Smit JH,  
698 Wright FA, Sullivan PF, Boomsma DI, Penninx BW (2014) Sex differences in the human  
699 peripheral blood transcriptome. *BMC Genomics* 15:33 Available at:  
700 <http://dx.doi.org/10.1186/1471-2164-15-33>.

701 Jiang H, Lei R, Ding S-W, Zhu S (2014) Skewer: a fast and accurate adapter trimmer for next-  
702 generation sequencing paired-end reads. *BMC Bioinformatics* 15:182 Available at:  
703 <http://www.biomedcentral.com/1471-2105/15/182>.

704 Johnston RF, Johnson SG (1989) Nonrandom Mating in Feral Pigeons. *Condor* 91:23–29  
705 Available at: <http://www.jstor.org/stable/1368144>.

706 Kannan S, Hui J, Mazooji K, Pachter L, Tse D (2016) Shannon: An Information-Optimal de Novo  
707 RNA-Seq Assembler. *Cold Spring Harbor Labs Journals*. Available at:  
708 <http://biorxiv.org/lookup/doi/10.1101/039230>.

709 Karten HJ, Hodos W (1967) A stereotaxic atlas of the brain of the pigeon: *Columba livia*. Johns  
710 Hopkins Press.

711 Kelly AM, Goodson JL (2014) Hypothalamic oxytocin and vasopressin neurons exert sex-  
712 specific effects on pair bonding, gregariousness, and aggression in finches. *Proc Natl Acad*  
713 *Sci U S A* 111:6069–6074 Available at: <http://dx.doi.org/10.1073/pnas.1322554111>.

714 Lake JI, Lange HS, O'Brien S, Sanford SE, Maney DL (2008) Activity of the hypothalamic-  
715 pituitary-gonadal axis differs between behavioral phenotypes in female white-throated  
716 sparrows (*Zonotrichia albicollis*). *Gen Comp Endocrinol* 156:426–433 Available at:  
717 <http://dx.doi.org/10.1016/j.ygcen.2007.12.009>.

718 Lex A, Gehlenborg N, Strobel H, Vuilleumot R, Pfister H (2014) UpSet: Visualization of  
719 Intersecting Sets. *IEEE Trans Vis Comput Graph* 20:1983–1992 Available at:  
720 <http://dx.doi.org/10.1109/TVCG.2014.2346248>.

721 Liley NR (1976) The role of estrogen and progesterone in the regulation of reproductive

- 722 behaviour in female ring doves ( *Streptopelia risoria* ) under long vs. short photoperiods.  
723 Can J Zool 54:1409–1422 Available at:  
724 <http://www.nrcresearchpress.com/doi/abs/10.1139/z76-164>.
- 725 Lim MM, Wang Z, Olazábal DE, Ren X, Terwilliger EF, Young LJ (2004) Enhanced partner  
726 preference in a promiscuous species by manipulating the expression of a single gene.  
727 Nature 429:754–757 Available at: <http://dx.doi.org/10.1038/nature02539>.
- 728 Liu J, Li G, Chang Z, Yu T, Liu B, McMullen R, Chen P, Huang X (2016) BinPacker: Packing-  
729 Based De Novo Transcriptome Assembly from RNA-seq Data. PLoS Comput Biol  
730 12:e1004772 Available at: <http://dx.plos.org/10.1371/journal.pcbi.1004772>.
- 731 Liu W, Li D, Liu J, Chen S, Qu L, Zheng J, Xu G, Yang N (2011) A Genome-Wide SNP Scan  
732 Reveals Novel Loci for Egg Production and Quality Traits in White Leghorn and Brown-Egg  
733 Dwarf Layers. PLoS One 6:e28600 Available at:  
734 <http://journals.plos.org/plosone/article/asset?id=10.1371/journal.pone.0028600.PDF>  
735 [Accessed October 26, 2016].
- 736 Lovell-mansbridge C, Birkhead TR (1998) Do female pigeons trade pair copulations for  
737 protection? Anim Behav 56:235–241 Available at:  
738 <http://dx.doi.org/10.1006/anbe.1998.0774>.
- 739 MacManes MD (2015) Establishing evidenced-based best practice for the de novo assembly  
740 and evaluation of transcriptomes from non-model organisms. biorxiv.org:1–23 Available at:  
741 <http://biorxiv.org/lookup/doi/10.1101/035642>.
- 742 McCarthy DJ, Chen Y, Smyth GK (2012) Differential expression analysis of multifactor RNA-Seq  
743 experiments with respect to biological variation. Nucleic Acids Res 40:4288–4297 Available  
744 at: <http://dx.doi.org/10.1093/nar/gks042>.
- 745 Murton RK, Westwood NJ (1977) Avian breeding cycles. Oxford University Press, USA.
- 746 Nelson, Kriegsfield (2017) Introduction to Behavioral Endocrinology. Sinauer.
- 747 Nishida Y, Yoshioka M, St-Amand J (2005) Sexually dimorphic gene expression in the  
748 hypothalamus, pituitary gland, and cortex. Genomics 85:679–687 Available at:  
749 <http://www.sciencedirect.com/science/article/pii/S0888754305000595>.
- 750 Ondrasek NR (2016) Emerging Frontiers in Social Neuroendocrinology and the Study of  
751 Nonapeptides. Ethology 122:443–455 Available at: <http://dx.doi.org/10.1111/eth.12493>.
- 752 Park J-Y, Su Y-Q, Ariga M, Law E, Jin S-LC, Conti M (2004) EGF-like growth factors as  
753 mediators of LH action in the ovulatory follicle. Science 303:682–684 Available at:  
754 <http://dx.doi.org/10.1126/science.1092463>.
- 755 Patro R, Duggal G, Kingsford C (2015) Accurate, fast, and model-aware transcript expression  
756 quantification with Salmon. biorxiv.org:1–35 Available at:  
757 <http://biorxiv.org/lookup/doi/10.1101/021592>.
- 758 Peterson MP, Whittaker DJ, Ambreth S, Sureshchandra S, Buechlein A, Podicheti R, Choi J-H,  
759 Lai Z, Mockatis K, Colbourne J, Tang H, Ketterson ED (2012) De novo transcriptome  
760 sequencing in a songbird, the dark-eyed junco (*Junco hyemalis*): genomic tools for an



761 ecological model system. BMC Genomics 13:305 Available at:  
762 <http://dx.doi.org/10.1186/1471-2164-13-305>.

763 Qin F, Wang X, Liu S, Zheng Y, Li M, Zhang Y, Wang Z (2014) Gene expression profiling of key  
764 genes in hypothalamus-pituitary-gonad axis of rare minnow *Gobiocypris rarus* in response  
765 to EE2. Gene 552:8–17 Available at: <http://dx.doi.org/10.1016/j.gene.2014.09.006>.

766 Robinson MD, McCarthy DJ, Smyth GK (2010) edgeR: a Bioconductor package for differential  
767 expression analysis of digital gene expression data. Bioinformatics 26:139–140 Available  
768 at: <http://bioinformatics.oxfordjournals.org/cgi/doi/10.1093/bioinformatics/btp616>.

769 RStudio Team (2015) RStudio: Integrated Development for R. Available at:  
770 <http://www.rstudio.com/> [Accessed September 1, 2016].

771 Saier MH Jr, Tran CV, Barabote RD (2006) TCDB: the Transporter Classification Database for  
772 membrane transport protein analyses and information. Nucleic Acids Res 34:D181–D186  
773 Available at: <http://dx.doi.org/10.1093/nar/gkj001>.

774 Saldanha CJ, Walters BJ, Fraley GS (2010) Neurons that co-localize aromatase- and  
775 kisspeptin-like immunoreactivity may regulate the HPG axis of the Mallard drake (*Anas*  
776 *platyrhynchos*). Gen Comp Endocrinol 166:606–613 Available at:  
777 <http://dx.doi.org/10.1016/j.ygcen.2010.01.007>.

778 Sell-Kubiak E, Duijvesteijn N, Lopes MS, Janss LLG, Knol EF, Bijma P, Mulder HA (2015)  
779 Genome-wide association study reveals novel loci for litter size and its variability in a Large  
780 White pig population. BMC Genomics 16:1049 Available at:  
781 <http://dx.doi.org/10.1186/s12864-015-2273-y>.

782 Serão NV, González-Peña D, Beever JE, Faulkner DB, Southey BR, Rodriguez-Zas SL (2013)  
783 Single nucleotide polymorphisms and haplotypes associated with feed efficiency in beef  
784 cattle. BMC Genet 14:94 Available at: <http://dx.doi.org/10.1186/1471-2156-14-94>.

785 Shan L, Wu Q, Li Y, Shang H, Guo K, Wu J, Wei H, Zhao J, Yu J, Li M-H (2013) Transcriptome  
786 Profiling Identifies Differentially Expressed Genes in Postnatal Developing Pituitary Gland  
787 of Miniature Pig. DNA Res Available at:  
788 <http://dnaresearch.oxfordjournals.org/content/early/2013/11/26/dnares.dst051.abstract>.

789 Sherwood NM, Sower SA (1985) A new family member for gonadotropin-releasing hormone.  
790 Neuropeptides 6:205–214 Available at: <https://www.ncbi.nlm.nih.gov/pubmed/3895023>.

791 Shimada M, Hernandez-Gonzalez I, Gonzalez-Robayna I, Richards JS (2006) Paracrine and  
792 Autocrine Regulation of Epidermal Growth Factor-Like Factors in Cumulus Oocyte  
793 Complexes and Granulosa Cells: Key Roles for Prostaglandin Synthase 2 and  
794 Progesterone Receptor. Mol Endocrinol 20:1352–1365 Available at:  
795 <http://dx.doi.org/10.1210/me.2005-0504>.

796 Silver R (1984) Prolactin and parenting in the pigeon family. J Exp Zool 232:617–625 Available  
797 at: <http://dx.doi.org/10.1002/jez.1402320330>.

798 Simão FA, Waterhouse RM, Ioannidis P, Kriventseva EV, Zdobnov EM (2015) BUSCO:  
799 assessing genome assembly and annotation completeness with single-copy orthologs.  
800 Bioinformatics 31:3210–3212 Available at:

- 801 <http://bioinformatics.oxfordjournals.org/lookup/doi/10.1093/bioinformatics/btv351>.
- 802 Smith-Unna RD, Boursnell C, Patro R, Hibberd JM, Kelly S (2015) TransRate: reference free  
803 quality assessment of de-novo transcriptome assemblies. bioRxiv:1–25 Available at:  
804 <http://biorxiv.org/content/early/2015/06/27/021626>.
- 805 Soneson C, Love MI, Robinson MD (2015) Differential analyses for RNA-seq: transcript-level  
806 estimates improve gene-level inferences. F1000Res 4:1521–1519 Available at:  
807 <http://f1000research.com/articles/4-1521/v1>.
- 808 Song L, Florea L (2015) Rcorrector: efficient and accurate error correction for Illumina RNA-seq  
809 reads. Gigascience 4:48 Available at: <http://www.gigasciencejournal.com/content/4/1/48>.
- 810 Sower SA, Freamat M, Kavanaugh SI (2009/3) The origins of the vertebrate hypothalamic–  
811 pituitary–gonadal (HPG) and hypothalamic–pituitary–thyroid (HPT) endocrine systems:  
812 New insights from lampreys. Gen Comp Endocrinol 161:20–29 Available at:  
813 <http://www.sciencedirect.com/science/article/pii/S0016648008004255>.
- 814 Staes N, Koski SE, Helsen P, Fransen E, Eens M, Stevens JMG (2015) Chimpanzee sociability  
815 is associated with vasopressin (Avpr1a) but not oxytocin receptor gene (OXTR) variation.  
816 Horm Behav 75:84–90 Available at: <http://dx.doi.org/10.1016/j.yhbeh.2015.08.006>.
- 817 Sun L, Wang C, Huang L, Wu M, Zuo Z (2012) Transcriptome analysis of male and female  
818 *Sebastiscus marmoratus*. PLoS One 7:e50676 Available at:  
819 <http://dx.doi.org/10.1371/journal.pone.0050676>.
- 820 Trabzuni D, Ramasamy A, Imran S, Walker R, Smith C, Weale ME, Hardy J, Ryten M (2013)  
821 Widespread sex differences in gene expression and splicing in the adult human brain. Nat  
822 Commun 4:2771 Available at:  
823 <http://www.nature.com/ncomms/2013/131122/ncomms3771/full/ncomms3771.html>  
824 [Accessed October 25, 2016].
- 825 Turner LM, Young AR, Römpler H, Schöneberg T, Phelps SM, Hoekstra HE (2010) Monogamy  
826 evolves through multiple mechanisms: evidence from V1aR in deer mice. Mol Biol Evol  
827 27:1269–1278 Available at: <http://mbe.oxfordjournals.org/content/27/6/1269.full>.
- 828 Usherwood JR (2008) Collared doves *Streptopelia decaocto* display with high, near-maximal  
829 muscle powers, but at low energetic cost. J Avian Biol 39:19–23 Available at:  
830 <http://dx.doi.org/10.1111/j.0908-8857.2008.04347.x>.
- 831 Vézina F, Salvante KG, Williams TD (2003) The metabolic cost of avian egg formation: possible  
832 impact of yolk precursor production? J Exp Biol 206:4443–4451 Available at:  
833 <https://www.ncbi.nlm.nih.gov/pubmed/14610029>.
- 834 Wacker DW, Wingfield JC, Davis JE, Meddle SL (2010) Seasonal changes in aromatase and  
835 androgen receptor, but not estrogen receptor mRNA expression in the brain of the free-  
836 living male song sparrow, *Melospiza melodia morphna*. J Comp Neurol 518:3819–3835  
837 Available at:  
838 <http://links.isiglobalnet2.com/gateway/Gateway.cgi?GWVersion=2&SrcAuth=mekentosj&SrcApp=Papers&DestLinkType=FullRecord&DestApp=WOS&KeyUT=000280600400010>.  
839
- 840 Walters KA, Middleton LJ, Joseph SR, Hazra R, Jimenez M, Simanainen U, Allan CM,



- 841 Handelsman DJ (2012) Targeted loss of androgen receptor signaling in murine granulosa  
842 cells of preantral and antral follicles causes female subfertility. *Biol Reprod* 87:151  
843 Available at: <http://dx.doi.org/10.1095/biolreprod.112.102012>.
- 844 Walum H, Westberg L, Henningsson S, Neiderhiser JM, Reiss D, Igl W, Ganiban JM, Spotts EL,  
845 Pedersen NL, Eriksson E, Lichtenstein P (2008) Genetic variation in the vasopressin  
846 receptor 1a gene (AVPR1A) associates with pair-bonding behavior in humans. *Proceedings*  
847 *of the National Academy of Sciences* 105:14153–14156 Available at:  
848 <http://www.pnas.org/cgi/doi/10.1073/pnas.0803081105>.
- 849 Wang R-L, Bencic D, Lazorchak J, Villeneuve D, Ankley GT (2011) Transcriptional regulatory  
850 dynamics of the hypothalamic-pituitary-gonadal axis and its peripheral pathways as  
851 impacted by the 3-beta HSD inhibitor trilostane in zebrafish (*Danio rerio*). *Ecotoxicol*  
852 *Environ Saf* 74:1461–1470 Available at: <http://dx.doi.org/10.1016/j.ecoenv.2011.05.001>.
- 853 Waterhouse RM, Tegenfeldt F, Li J, Zdobnov EM, Kriventseva EV (2013) OrthoDB: a  
854 hierarchical catalog of animal, fungal and bacterial orthologs. *Nucleic Acids Res* 41:D358–  
855 D365 Available at: <http://dx.doi.org/10.1093/nar/gks1116>.
- 856 Weickert CS, Elashoff M, Richards AB, Sinclair D, Bahn S, Paabo S, Khaitovich P, Webster MJ  
857 (2009) Transcriptome analysis of male–female differences in prefrontal cortical  
858 development. *Mol Psychiatry* 14:558–561 Available at: <http://dx.doi.org/10.1038/mp.2009.5>.
- 859 Xu J, Huang W, Zhong C, Luo D, Li S, Zhu Z, Hu W (2011) Defining global gene expression  
860 changes of the hypothalamic-pituitary-gonadal axis in female sGnRH-antisense transgenic  
861 common carp (*Cyprinus carpio*). *PLoS One* 6:e21057 Available at:  
862 <http://dx.doi.org/10.1371/journal.pone.0021057>.
- 863 Young IT (1977) Proof without prejudice: use of the Kolmogorov-Smirnov test for the analysis of  
864 histograms from flow systems and other sources. *J Histochem Cytochem* 25:935–941  
865 Available at: <https://www.ncbi.nlm.nih.gov/pubmed/894009>.
- 866 Zhang X, Hecker M, Park J-W, Tompsett AR, Newsted J, Nakayama K, Jones PD, Au D, Kong  
867 R, Wu RSS, Giesy JP (2008) Real-time PCR array to study effects of chemicals on the  
868 Hypothalamic-Pituitary-Gonadal axis of the Japanese medaka. *Aquat Toxicol* 88:173–182  
869 Available at: <http://dx.doi.org/10.1016/j.aquatox.2008.04.009>.
- 870 Zhang Z, Wang Y, Wang S, Liu J, Warren W, Mitreva M, Walter RB (2011) Transcriptome  
871 Analysis of Female and Male *Xiphophorus maculatus* Jp 163 A. *PLoS One* 6:e18379  
872 Available at:  
873 <http://journals.plos.org/plosone/article/asset?id=10.1371/journal.pone.0018379.PDF>.
